# Supplementary material for: Metagenomic Analysis Reveals Neisseria bacilliformis Variation in the Early Childhood Caries Plaque Microbiome
Source: Hindawi journal article supplement (doi:10.1155/2021/2774772), 2021-10-21
Supplement: f1 [file 2774772.f1.pdf]

Supplementary Table S1 Anosim analysis of difference among CF, ECC and SECC

| Group    | bray curtis |         | weight unfrac |         | unweight unfrac |         |
|----------|-------------|---------|---------------|---------|-----------------|---------|
|          | R-value     | P-value | R-value       | P-value | R-value         | P-value |
| ECC-SECC | 0.01089     | 0.291   | 0.008051      | 0.316   | 0.06519         | 0.012   |
| CF-SECC  | 0.03395     | 0.061   | 0.01136       | 0.266   | 0.1239          | 0.001   |
| CF-ECC   | -0.00151    | 0.455   | -0.02371      | 0.946   | 0.03502         | 0.04    |

# R-value shows the difference among CF, ECC and SECC. R-value less than zero represents that the difference of samples within group is larger than between groups, whereas value greater than zero indicates that the difference of samples between groups is larger than within group. \*

Significant level P-value = 0.05.

Supplementary Table S2 Significant pathway between CF, ECC and SECC groups

| up                                      |                    |                 |            |        |        |            |                                      |                                          |
|-----------------------------------------|--------------------|-----------------|------------|--------|--------|------------|--------------------------------------|------------------------------------------|
| #Pathway                                | CF-vs-ECC_Up(37)   | Reference(4362) | RichFactor | Pvalue | Qvalue | Pathway ID | Level 1                              | Level 2                                  |
| Basal transcription factors             | 1                  | 4               | 0.25       | 0.0335 | 0.3924 | ko03022    | Genetic Information Processing       | Transcription                            |
| #Pathway                                | CF-vs-SECC_Up(145) | Reference(4402) | RichFactor | Pvalue | Qvalue | Pathway ID | Level 1                              | Level 2                                  |
| Propanoate metabolism                   | 9                  | 65              | 0.1385     | 0.0002 | 0.0113 | ko00640    | Metabolism                           | Carbohydrate metabolism                  |
| Selenocompound metabolism               | 5                  | 20              | 0.25       | 0.0004 | 0.0113 | ko00450    | Metabolism                           | Metabolism of other amino acids          |
| Glyoxylate and dicarboxylate metabolism | 7                  | 60              | 0.1167     | 0.0033 | 0.0651 | ko00630    | Metabolism                           | Carbohydrate metabolism                  |
| Phosphotransferase system (PTS)         | 6                  | 59              | 0.1017     | 0.0123 | 0.185  | ko02060    | Environmental Information Processing | Membrane transport                       |
| Biosynthesis of ansamycins              | 1                  | 1               | 1          | 0.0329 | 0.2856 | ko01051    | Metabolism                           | Metabolism of terpenoids and polyketides |

|                                                        |   |   |        |        |        |         |            |                                             |
|--------------------------------------------------------|---|---|--------|--------|--------|---------|------------|---------------------------------------------|
| Nonribosomal peptide structures                        | 1 | 1 | 1      | 0.0329 | 0.2856 | ko01054 | Metabolism | Metabolism of terpenoids and polyketides    |
| Tropane, piperidine and pyridine alkaloid biosynthesis | 2 | 9 | 0.2222 | 0.0333 | 0.2856 | ko00960 | Metabolism | Biosynthesis of other secondary metabolites |

| #Pathway                                | ECC-vs-SECC_Up(154) | Reference(4447) | RichFactor | Pvalue | Qvalue | Pathway ID | Level 1                              | Level 2                                  |
|-----------------------------------------|---------------------|-----------------|------------|--------|--------|------------|--------------------------------------|------------------------------------------|
| Propanoate metabolism                   | 11                  | 65              | 0.1692     | 0      | 0.0006 | ko00640    | Metabolism                           | Carbohydrate metabolism                  |
| Phosphotransferase system (PTS)         | 10                  | 59              | 0.1695     | 0      | 0.0008 | ko02060    | Environmental Information Processing | Membrane transport                       |
| Fructose and mannose metabolism         | 9                   | 59              | 0.1525     | 0.0002 | 0.0032 | ko00051    | Metabolism                           | Carbohydrate metabolism                  |
| Galactose metabolism                    | 6                   | 42              | 0.1429     | 0.0029 | 0.0438 | ko00052    | Metabolism                           | Carbohydrate metabolism                  |
| Glyoxylate and dicarboxylate metabolism | 7                   | 61              | 0.1148     | 0.0047 | 0.0567 | ko00630    | Metabolism                           | Carbohydrate metabolism                  |
| Nonribosomal peptide structures         | 1                   | 1               | 1          | 0.0346 | 0.3463 | ko01054    | Metabolism                           | Metabolism of terpenoids and polyketides |
| Glycerolipid metabolism                 | 3                   | 24              | 0.125      | 0.0484 | 0.4148 | ko00561    | Metabolism                           | Lipid metabolism                         |

**down**

| #Pathway                              | CF-vs-ECC_Down(92) | Reference(4362) | RichFactor | Pvalue | Qvalue | Pathway ID | Level 1                              | Level 2                                  |
|---------------------------------------|--------------------|-----------------|------------|--------|--------|------------|--------------------------------------|------------------------------------------|
| Cell cycle - Caulobacter              | 6                  | 24              | 0.25       | 0      | 0.0003 | ko04112    | Cellular Processes                   | Cell growth and death                    |
| Bacterial secretion system            | 8                  | 53              | 0.1509     | 0      | 0.0003 | ko03070    | Environmental Information Processing | Membrane transport                       |
| Geraniol degradation                  | 2                  | 9               | 0.2222     | 0.0144 | 0.2062 | ko00281    | Metabolism                           | Metabolism of terpenoids and polyketides |
| RIG-I-like receptor signaling pathway | 1                  | 1               | 1          | 0.0211 | 0.2267 | ko04622    | Organismal Systems                   | Immune system                            |
| Renin-angiotensin system              | 1                  | 2               | 0.5        | 0.0417 | 0.2992 | ko04614    | Organismal Systems                   | Endocrine system                         |

|                         |   |   |     |        |        |         |                |                                   |
|-------------------------|---|---|-----|--------|--------|---------|----------------|-----------------------------------|
| African trypanosomiasis | 1 | 2 | 0.5 | 0.0417 | 0.2992 | ko05143 | Human Diseases | Infectious diseases:<br>Parasitic |
|-------------------------|---|---|-----|--------|--------|---------|----------------|-----------------------------------|

| #Pathway                                      | CF-vs-<br>SECC_Down(1<br>32) | Reference(<br>4402) | RichFactor | Pvalue | Qvalue | Pathway ID | Level 1               | Level 2                                           |
|-----------------------------------------------|------------------------------|---------------------|------------|--------|--------|------------|-----------------------|---------------------------------------------------|
| Cell cycle - Caulobacter                      | 8                            | 23                  | 0.3478     | 0      | 0      | ko04112    | Cellular<br>Processes | Cell growth and<br>death                          |
| Propanoate metabolism                         | 8                            | 65                  | 0.1231     | 0.0006 | 0.0253 | ko00640    | Metabolism            | Carbohydrate<br>metabolism<br>Xenobiotics         |
| Dioxin degradation                            | 2                            | 6                   | 0.3333     | 0.0124 | 0.1599 | ko00621    | Metabolism            | biodegradation and<br>metabolism<br>Metabolism of |
| Carotenoid biosynthesis                       | 2                            | 6                   | 0.3333     | 0.0124 | 0.1599 | ko00906    | Metabolism            | terpenoids and<br>polyketides                     |
| Degradation of aromatic<br>compounds          | 4                            | 36                  | 0.1111     | 0.0217 | 0.1599 | ko01220    | Metabolism            | Global and overview<br>maps                       |
| Valine, leucine and<br>isoleucine degradation | 4                            | 37                  | 0.1081     | 0.0237 | 0.1599 | ko00280    | Metabolism            | Amino acid<br>metabolism                          |
| Small cell lung cancer                        | 1                            | 1                   | 1          | 0.03   | 0.1599 | ko05222    | Human Diseases        | Cancers: Specific<br>types                        |
| Influenza A                                   | 1                            | 1                   | 1          | 0.03   | 0.1599 | ko05164    | Human Diseases        | Infectious diseases:<br>Viral                     |
| p53 signaling pathway                         | 1                            | 1                   | 1          | 0.03   | 0.1599 | ko04115    | Cellular<br>Processes | Cell growth and<br>death                          |
| Hepatitis B                                   | 1                            | 1                   | 1          | 0.03   | 0.1599 | ko05161    | Human Diseases        | Infectious diseases:<br>Viral                     |
| Toxoplasmosis                                 | 1                            | 1                   | 1          | 0.03   | 0.1599 | ko05145    | Human Diseases        | Infectious diseases:<br>Parasitic                 |
| Monoterpenoid<br>biosynthesis                 | 1                            | 1                   | 1          | 0.03   | 0.1599 | ko00902    | Metabolism            | Metabolism of<br>terpenoids and<br>polyketides    |
| Colorectal cancer                             | 1                            | 1                   | 1          | 0.03   | 0.1599 | ko05210    | Human Diseases        | Cancers: Specific<br>types                        |
| Steroid biosynthesis                          | 1                            | 1                   | 1          | 0.03   | 0.1599 | ko00100    | Metabolism            | Lipid metabolism                                  |
| Viral myocarditis                             | 1                            | 1                   | 1          | 0.03   | 0.1599 | ko05416    | Human Diseases        | Cardiovascular<br>diseases                        |

| #Pathway | ECC-vs-<br>SECC_Down(1<br>79) | Reference(<br>4447) | RichFactor | Pvalue | Qvalue | Pathway ID | Level 1 | Level 2 |
|----------|-------------------------------|---------------------|------------|--------|--------|------------|---------|---------|
|----------|-------------------------------|---------------------|------------|--------|--------|------------|---------|---------|

|                                           |    |    |        |        |        |         |            |                                              |
|-------------------------------------------|----|----|--------|--------|--------|---------|------------|----------------------------------------------|
| Oxidative phosphorylation                 | 11 | 74 | 0.1486 | 0.0002 | 0.0075 | ko00190 | Metabolism | Energy metabolism                            |
| Chloroalkane and chloroalkene degradation | 3  | 14 | 0.2143 | 0.0168 | 0.4205 | ko00625 | Metabolism | Xenobiotics<br>biodegradation and metabolism |

---

Supplementary Table S3 Basic statistics of samples for metagenome sequencing

| Sample Name | InsertSize(bp) | RawData(M) | CleanData(M) | Clean_Q20 | NonHost(%) | Effective(M) |
|-------------|----------------|------------|--------------|-----------|------------|--------------|
| CF16        | 350            | 13,224.25  | 13,220.19    | 96.88     | 99.97      | 12,928.32    |
| CF22        | 350            | 10,458.45  | 10,455.63    | 97.22     | 99.97      | 10,403.50    |
| CF7         | 350            | 10,298.91  | 10,296.71    | 96        | 99.98      | 10,158.90    |
| EC1         | 350            | 10,319.79  | 10,317.43    | 95.64     | 99.98      | 9,647.22     |
| EC26        | 350            | 10,587.26  | 10,584.08    | 96.66     | 99.97      | 10,561.02    |
| EC4         | 350            | 11,115.43  | 11,112.11    | 97        | 99.97      | 11,074.94    |
| SECC17      | 350            | 11,022.50  | 11,019.01    | 97.06     | 99.97      | 10,980.76    |
| SECC20      | 350            | 10,933.94  | 10,930.58    | 96.83     | 99.97      | 10,883.36    |
| SECC28      | 350            | 10,233.19  | 10,229.93    | 96.79     | 99.97      | 9,457.76     |
| SECC2       | 350            | 10,707.29  | 10,704.76    | 96.2      | 99.98      | 9,639.62     |

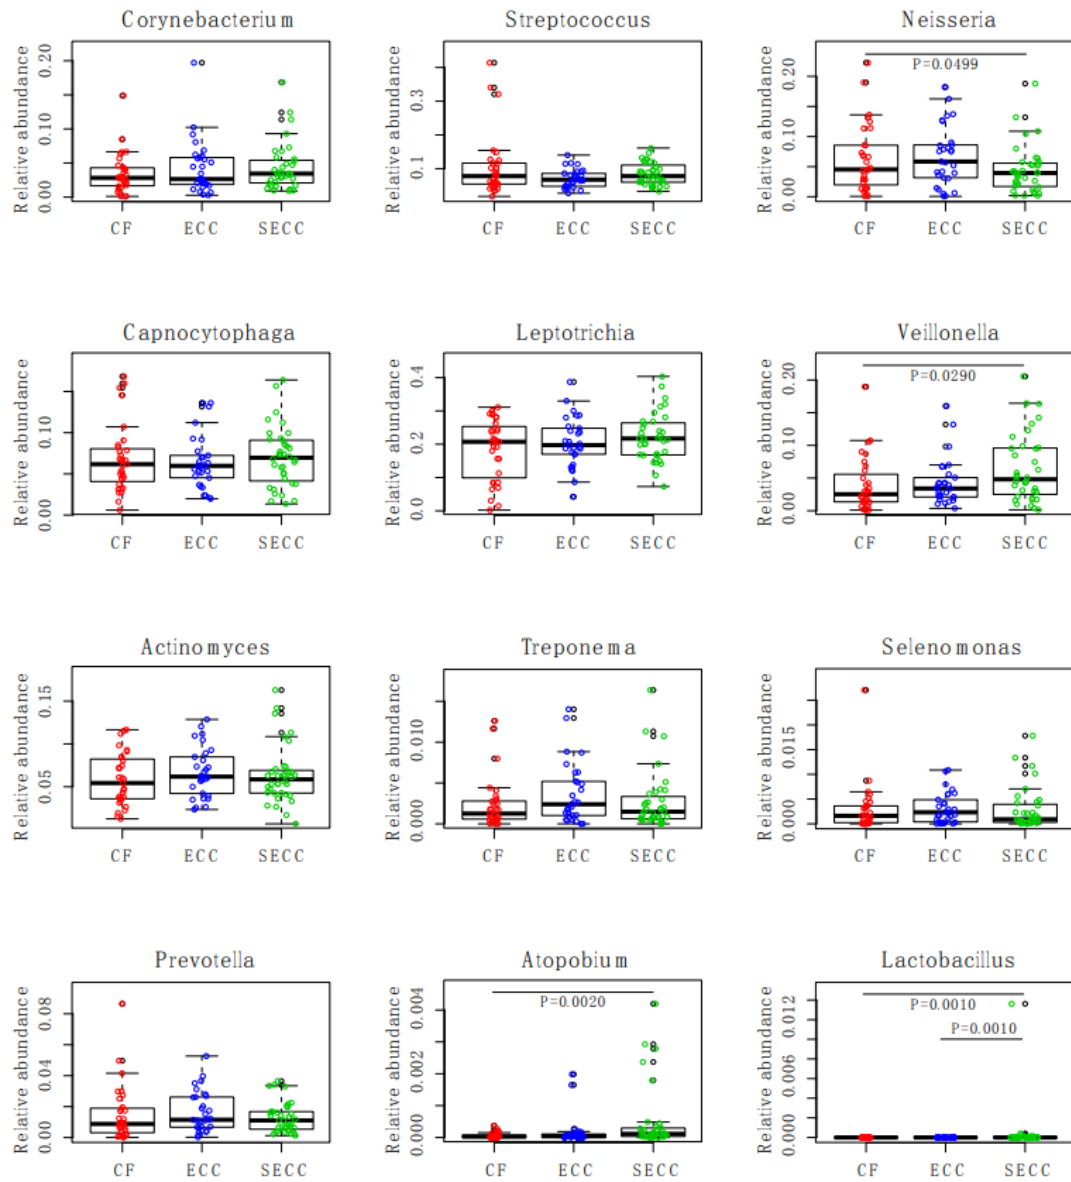

**Figure S1. Genus biomarkers for caries.**

The box depicts the interquartile range (IQR) between the first and third quartiles (25th and 75th percentiles, respectively) and the line inside denotes the median, whereas the points represent the abundance of sample.

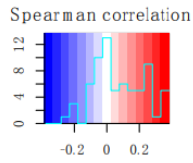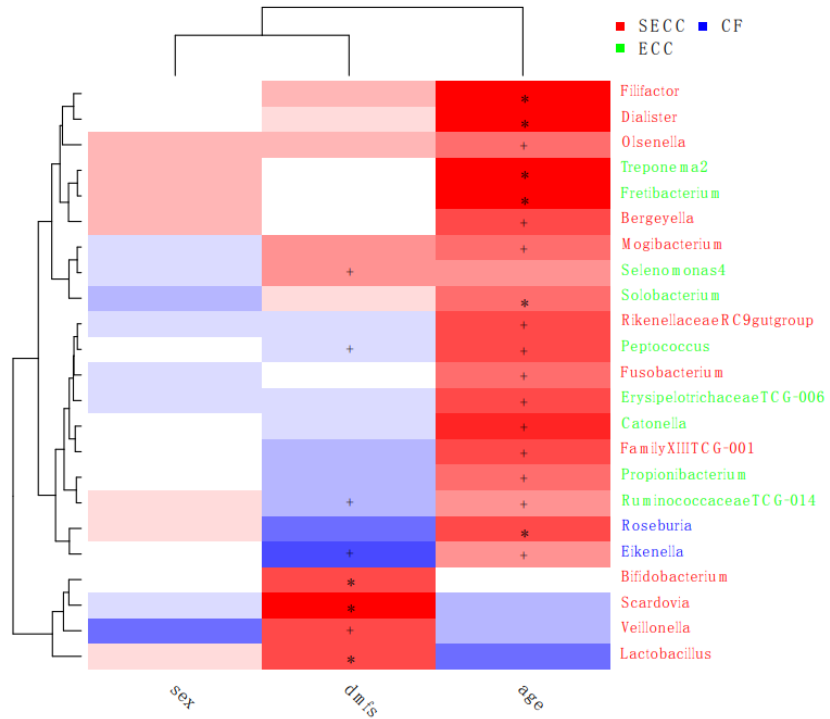

**Figure S2. Association between genus biomarkers and decayed, missing, and filled surface (dmfs) index.**

Heatmap of the spearman correlation between genus and dmfs, age, gender. BH adjusted p-value is denoted: +, q-value<0.1; \*, q-value<0.05; \*\*, q-value<0.01.

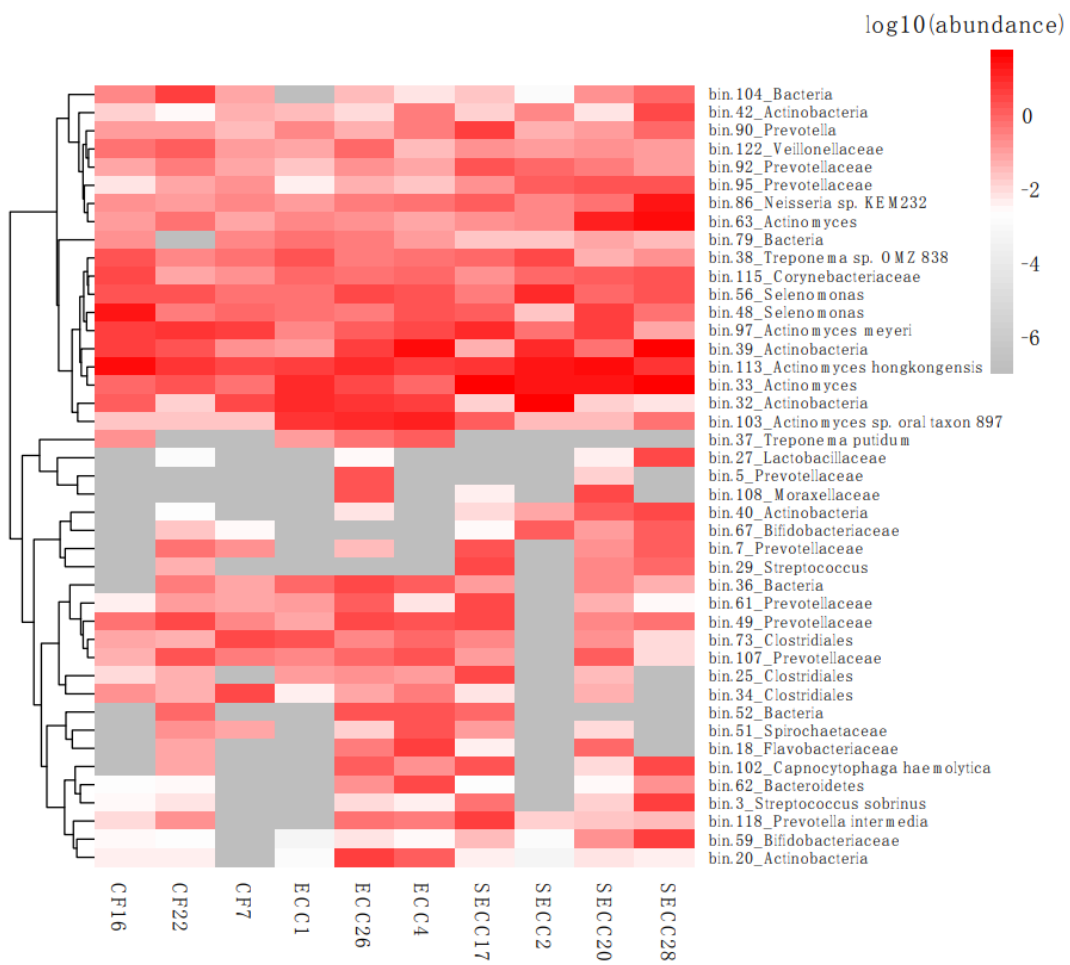

**Figure S3. MAGs population distribution.**

Heatmap of relative abundance of MAGs.

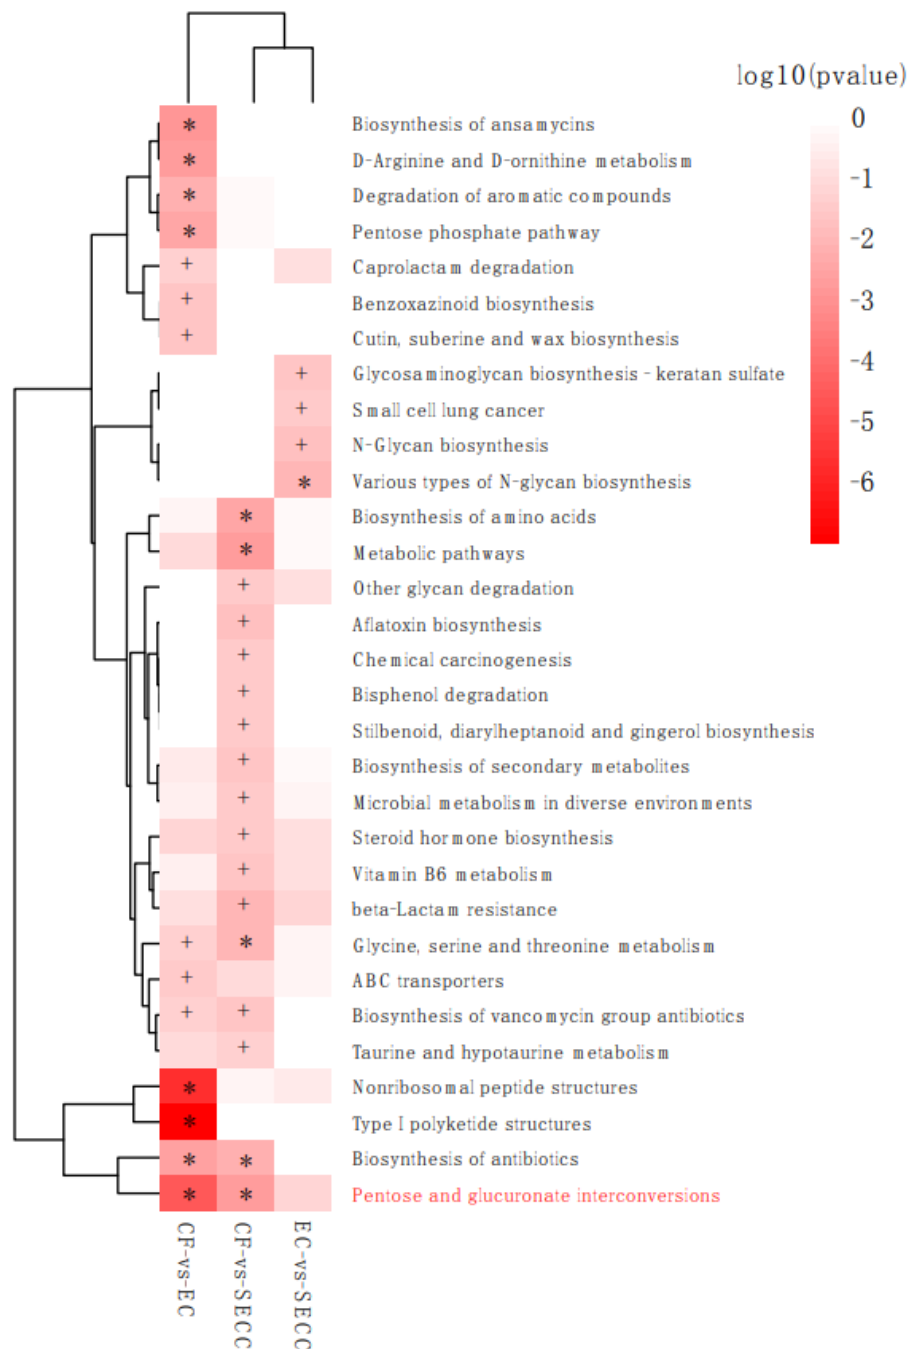

**Figure S4. Association between pathway and caries.**

Heatmap of the spearman correlation between pathway and caries. Wilcox test was used to compare groups. BH adjusted p-value is denoted: +, q-value<0.1; \*, q-value<0.05; \*\*, q-value<0.01.
